# Supplementary material for: Stable Vascular Connections and Remodeling Require Full Expression of VE-Cadherin in Zebrafish Embryos
Source: PubMed Central journal article supplement (PMC2685470; doi:10.1371/journal.pone.0005772), 2009-06-03

Figure S1. Montero-Balaguer et al.

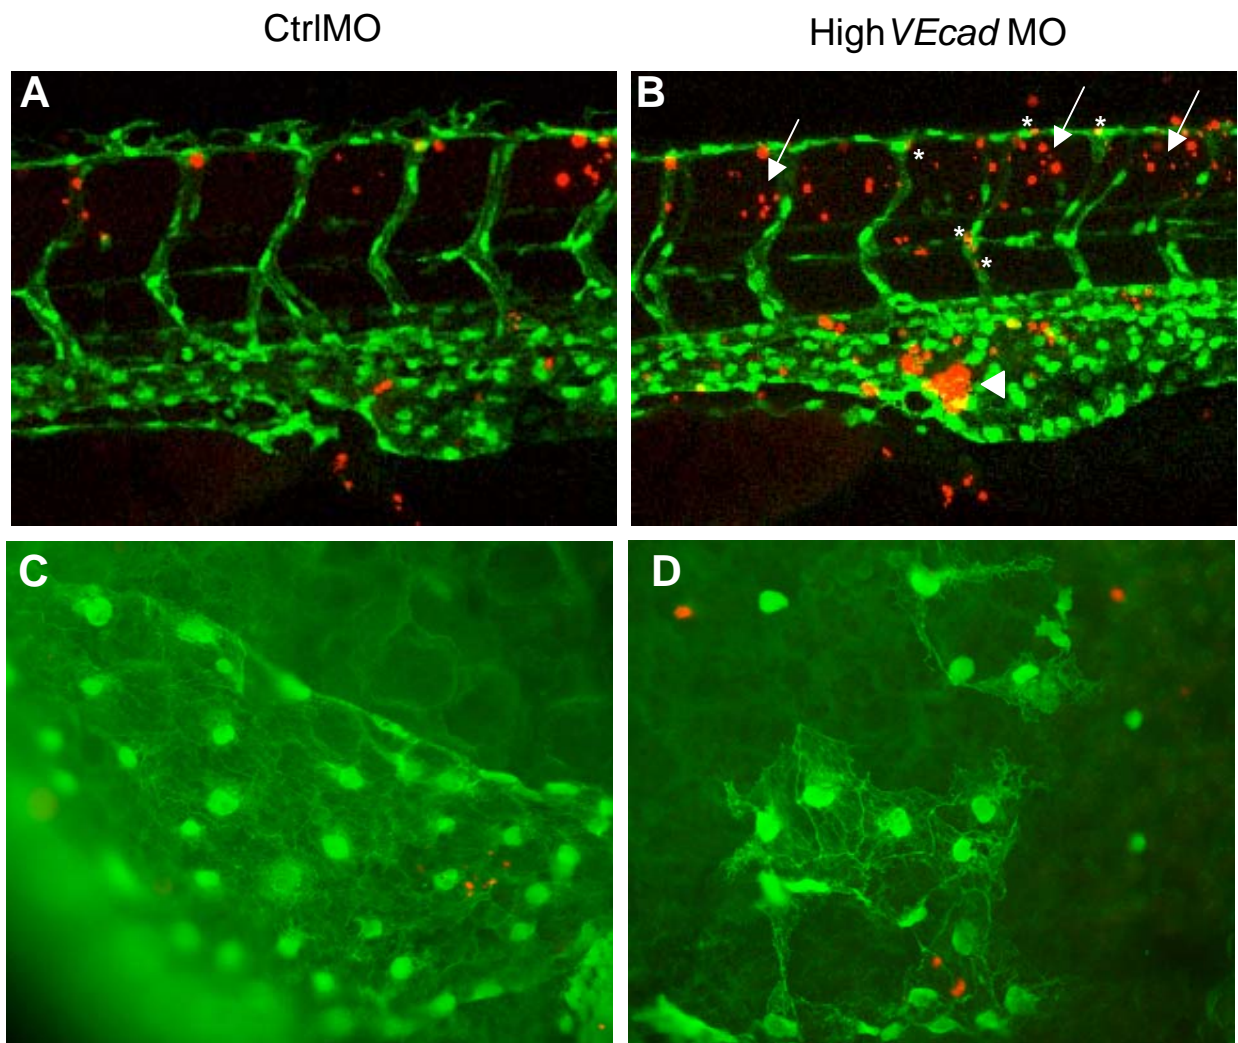

Supplement: pone.0005772.s001.pdf [file pone.0005772.s001.pdf]
