# Supplementary material for: Stable Vascular Connections and Remodeling Require Full Expression of VE-Cadherin in Zebrafish Embryos
Source: PubMed Central journal article supplement (PMC2685470; doi:10.1371/journal.pone.0005772), 2009-06-03
Supplement: pone.0005772.s002.pdf [file pone.0005772.s002.pdf]

**Figure S2. Montero-Balaguer et al.**

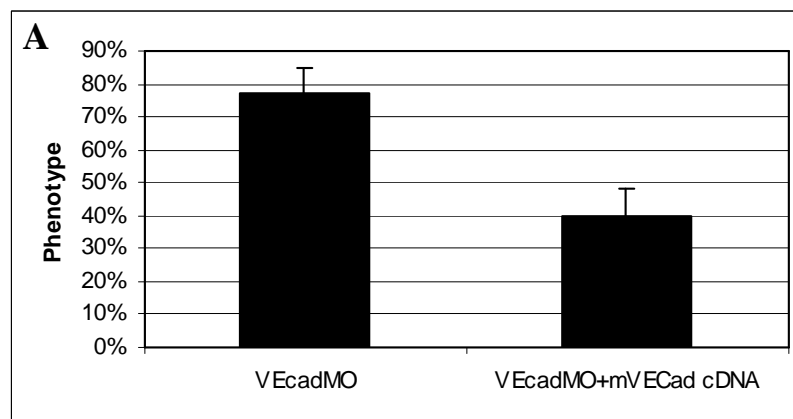

**Table I-Rescue injections**

| Injected material          | % of embryos with phenotype | No. of embryos with phenotype | No. of injected embryos |
|----------------------------|-----------------------------|-------------------------------|-------------------------|
| <i>VEcadMO</i>             | 77                          | 100                           | 128                     |
| <i>VEcadMO+mVEcad cDNA</i> | 40                          | 78                            | 205                     |

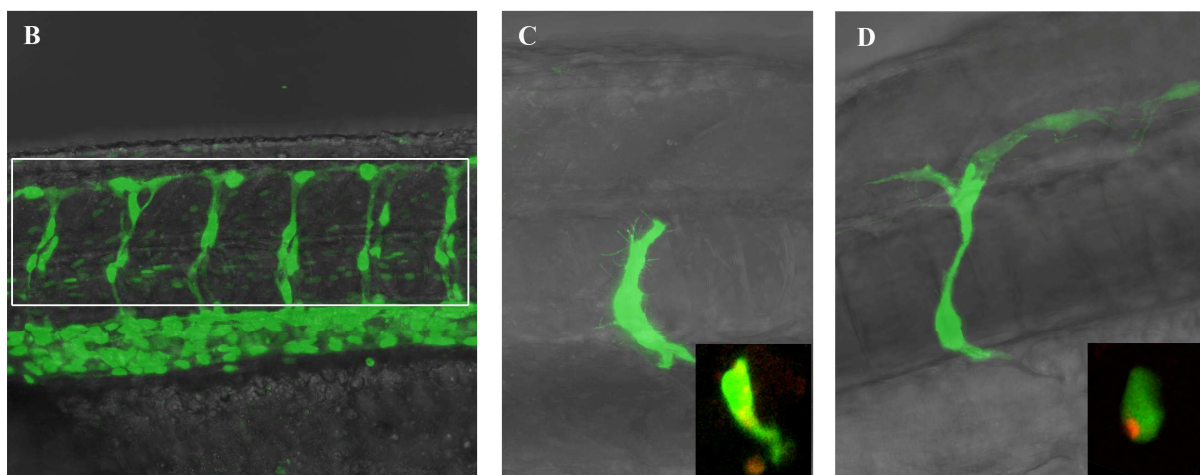

**Table II- Percentage of mosaicism**

| Injected material              | Average No. EC per reference area | Average No. EC with transgenes | % mosaicism |
|--------------------------------|-----------------------------------|--------------------------------|-------------|
| <i>VEcadMO+mVEcad cDNA+GFP</i> | 37                                | 3.5                            | 9.45        |
